# Supplementary material for: Highly water soluble agrichemicals by using engineered organic salts for reducing adverse environmental impacts
Source: Royal Society of Chemistry journal article supplement (doi:10.1039/c9gc02439e), 2019-01-01
Supplement: c9gc02439e1.pdf [file c9gc02439e1.pdf]

## SUPPORTING INFORMATION

### High water soluble agrichemicals by engineered organic salts for reducing adverse environmental impacts

Paulo de Sousa Carvalho Junior<sup>a</sup>, Gelton G. F. Guimarães<sup>a</sup>, Luan F. Diniz<sup>b</sup>, Javier Ellena<sup>b</sup>, Caue Ribeiro<sup>b, \*</sup>

<sup>a</sup>Instituto de Química, Universidade Federal do Mato Grosso do Sul, 79074-460, Campo Grande, Mato Grosso do Sul, Brazil. <sup>b</sup>EPAGRI – Empresa de Pesquisa Agropecuária e Extensão Rural de Santa Catarina. Rd. Antônio Heil 6800, CP 88318-112, Itajaí, SC, Brazil. <sup>c</sup>Instituto de Física de São Carlos. Universidade de São Paulo CP 369, 13560-970, São Carlos, SP, Brazil. <sup>d</sup>Forschungszentrum Jülich GmbH, Institute of Energy and Climate Research (IEK-3): Electrochemical Process Engineering, 52425 Jülich, Germany; and Embrapa Instrumentação Rua XV de novembro 1452, CP 13560-206, São Carlos, SP, Brazil. e-mail: [caue.ribeiro@embrapa.br](mailto:caue.ribeiro@embrapa.br)

**Table S1.** Crystal data and refinement parameters of AMT and AMT salts

| Compound                           | AMT                                                            | AMT FUM                                                         | AMT MAL-I                                                                      | AMT MAL-II                                                      | (AMTMAL)<br>·2H <sub>2</sub> O                                  |
|------------------------------------|----------------------------------------------------------------|-----------------------------------------------------------------|--------------------------------------------------------------------------------|-----------------------------------------------------------------|-----------------------------------------------------------------|
| Empirical formula                  | C <sub>18</sub> H <sub>34</sub> N <sub>10</sub> S <sub>2</sub> | C <sub>13</sub> H <sub>21</sub> N <sub>5</sub> O <sub>4</sub> S | C <sub>39</sub> H <sub>63</sub> N <sub>15</sub> O <sub>12</sub> S <sub>3</sub> | C <sub>13</sub> H <sub>21</sub> N <sub>5</sub> O <sub>4</sub> S | C <sub>13</sub> H <sub>25</sub> N <sub>5</sub> O <sub>6</sub> S |
| Formula weight                     | 454.67                                                         | 342.95                                                          | 343.41                                                                         | 343.41                                                          | 379.44                                                          |
| Temperature/K                      | 120                                                            | 120.0                                                           | 120.0                                                                          | 298                                                             | 298                                                             |
| Crystal system                     | Monoclinic                                                     | Monoclinic                                                      | Monoclinic                                                                     | Monoclinic                                                      | Triclinic                                                       |
| Space group                        | P2 <sub>1</sub> /c                                             | P2 <sub>1</sub> /c                                              | P2 <sub>1</sub> /c                                                             | P2 <sub>1</sub> /c                                              | P $\bar{1}$                                                     |
| a/Å                                | 12.018(4)                                                      | 18.132(3)                                                       | 13.495(3)                                                                      | 8.5300(3)                                                       | 8.8250(4)                                                       |
| b/Å                                | 22.054(6)                                                      | 11.105(2)                                                       | 16.262(3)                                                                      | 9.8310(3)                                                       | 9.7640(5)                                                       |
| c/Å                                | 9.300(3)                                                       | 16.920(3)                                                       | 23.781(5)                                                                      | 22.6570(8)                                                      | 12.0800(6)                                                      |
| α/°                                | 90                                                             | 90                                                              | 90                                                                             | 90                                                              | 107.075(4)                                                      |
| β/°                                | 101.617(5)                                                     | 95.693(3)                                                       | 99.226(4)                                                                      | 111.5740(10)                                                    | 100.749(3)                                                      |
| γ/°                                | 90                                                             | 90                                                              | 90                                                                             | 90                                                              | 96.427(3)                                                       |
| Volume/Å <sup>3</sup>              | 2414.5(12)                                                     | 3390.1(10)                                                      | 5151.4(17)                                                                     | 1766.87(10)                                                     | 962.04(8)                                                       |
| Z, Z'                              | 4, 2                                                           | 4, 2                                                            | 4, 3                                                                           | 4, 1                                                            | 2, 1                                                            |
| ρ <sub>calc</sub> /cm <sup>3</sup> | 1.251                                                          | 1.344                                                           | 1.328                                                                          | 1.291                                                           | 1.310                                                           |
| μ/mm <sup>-1</sup>                 | 0.247                                                          | 0.218                                                           | 0.215                                                                          | 0.209                                                           | 0.206                                                           |
| F(000)                             | 976.0                                                          | 1452.0                                                          | 2184.0                                                                         | 728.0                                                           | 404.0                                                           |
| Crystal size/mm <sup>3</sup>       | 0.253 x 0.076 x<br>0.021                                       | 0.277 x 0.12 x<br>0.121                                         | 0.218 x 0.096 x<br>0.04                                                        | 0.36 x 0.30 x<br>0.19                                           | 0.170 x 0.160 x<br>0.10                                         |
| 2θ range for data collection/°     | 5.8 to 52.744                                                  | 4.516 to 52.044                                                 | 4.98 to 51.358                                                                 | 7.13 to 50.786                                                  | 5.912 to 52.41                                                  |
| Index ranges                       | -15 ≤ h ≤ 15<br>-27 ≤ k ≤ 27<br>-11 ≤ l ≤ 11                   | -22 ≤ h ≤ 22<br>-13 ≤ k ≤ 13<br>-20 ≤ l ≤ 20                    | -16 ≤ h ≤ 16,<br>-19 ≤ k ≤ 19,<br>-28 ≤ l ≤ 28                                 | -10 ≤ h ≤ 10<br>-11 ≤ k ≤ 11<br>-27 ≤ l ≤ 27                    | -10 ≤ h ≤ 10<br>-12 ≤ k ≤ 11<br>-15 ≤ l ≤ 14                    |

|                                                |                                                                  |                                                                  |                                                                  |                                                                  |                                                                  |
|------------------------------------------------|------------------------------------------------------------------|------------------------------------------------------------------|------------------------------------------------------------------|------------------------------------------------------------------|------------------------------------------------------------------|
| Reflections collected                          | 50224                                                            | 67624                                                            | 101144                                                           | 6249                                                             | 6996                                                             |
| Independent reflections                        | 4917 [ $R_{\text{int}} = 0.1074$ , $R_{\text{sigma}} = 0.0515$ ] | 6669 [ $R_{\text{int}} = 0.0414$ , $R_{\text{sigma}} = 0.0267$ ] | 9760 [ $R_{\text{int}} = 0.0436$ , $R_{\text{sigma}} = 0.0210$ ] | 3227 [ $R_{\text{int}} = 0.0182$ , $R_{\text{sigma}} = 0.0279$ ] | 3806 [ $R_{\text{int}} = 0.0776$ , $R_{\text{sigma}} = 0.0876$ ] |
| Data/restraints/parameters                     | 4917/17/292                                                      | 6669/128/472                                                     | 9760/26/651                                                      | 3227/0/213                                                       | 3806/0/249                                                       |
| Goodness-of-fit on $F^2$                       | 1.030                                                            | 1.089                                                            | 1.028                                                            | 1.011                                                            | 1.027                                                            |
| Final R indexes [ $I \geq 2\sigma(I)$ ]        | $R_1 = 0.0562$ , $wR_2 = 0.1369$                                 | $R_1 = 0.0955$ , $wR_2 = 0.2342$                                 | $R_1 = 0.0545$ , $wR_2 = 0.1436$                                 | $R_1 = 0.0590$ , $wR_2 = 0.1761$                                 | $R_1 = 0.0651$ , $wR_2 = 0.1754$                                 |
| Final R indexes [all data]                     | $R_1 = 0.0944$ , $wR_2 = 0.1595$                                 | $R_1 = 0.1009$ , $wR_2 = 0.2379$                                 | $R_1 = 0.0671$ , $wR_2 = 0.1531$                                 | $R_1 = 0.0789$ , $wR_2 = 0.1934$                                 | $R_1 = 0.1077$ , $wR_2 = 0.2094$                                 |
| Largest diff. peak/hole / $e \text{ \AA}^{-3}$ | 0.64/-0.52                                                       | 1.51/-0.66                                                       | 1.38/-1.15                                                       | 0.75/-0.28                                                       | 0.24/-0.35                                                       |

**Table S2.** The  $pK_a$  differences between AMT and the conformer (carboxylic acids). Following this approach, the salt formation is expected for both cases, even to HFUM that  $\Delta pK_a$  is less than 2-3  $pK_a$  units<sup>[1]</sup>.

| Compound            | $pK_{a1}$ | $\Delta pK_a = pK_a(\text{AMT}) - pK_{a1}(\text{acid})$ |
|---------------------|-----------|---------------------------------------------------------|
| Ametryn (AMT)       | 4.10      | -                                                       |
| Fumaric acid (HFUM) | 3.03      | 1.07                                                    |
| Maleic acid (HMAL)  | 1.83      | 2.27                                                    |

**Table S3.** Geometric parameters of the H-bonds in the AMT and AMT salts.

| <b>Interaction</b> | <b>D···A(Å)</b> | <b>H···A(Å)</b> | <b>D–H···A(°)</b> | <b>Symmetry Code</b> |
|--------------------|-----------------|-----------------|-------------------|----------------------|
| <b>AMT</b>         |                 |                 |                   |                      |
| N2B–H2B···N3A      | 3.077(3)        | 2.249(2)        | 161.38(17)        | x+1,+y,+z            |
| N4A–H4A···N1B      | 3.033(3)        | 2.182(2)        | 170.44(18)        | x-1,+y,+z            |
| N4B–H4B···N1A      | 3.007(4)        | 2.155(3)        | 170.79(17)        | x,y,z                |
| N2A–H2A···N3B      | 3.126(4)        | 2.269(3)        | 174.92(19)        | x,y,z                |
| C9A–H9AB···N2B     | 3.487(5)        | 2.730(3)        | 136.28(25)        | x-1,+y,+z            |
| C9A–H9AA···N4A     | 3.613(5)        | 2.673(3)        | 166.40(26)        | x,-y+1/2,+z-1/2      |
| <b>AMT FUM</b>     |                 |                 |                   |                      |
| N5–H5···O1A        | 2.687(4)        | 1.810(3)        | 173.66(22)        | x,y,z                |
| N4A–H4A···O2A      | 2.771(4)        | 1.903(3)        | 168.36(22)        | x,y,z                |
| N5B–H5B···O1B      | 2.783(11)       | 1.910(10)       | 171.04(36)        | x,y,z                |
| N2B–H2B···O2B      | 2.522(18)       | 1.654(15)       | 167.84(69)        | x,y,z                |
| O4A–H4AE···O1A     | 2.534(4)        | 1.696(3)        | 176.20(22)        | -x+1,+y-1/2,-z+1/2+1 |
| N2A–H2A···O3A      | 2.833(5)        | 2.025(4)        | 152.22(25)        | -x+1,+y+1/2,-z+1/2+1 |
| N4B–H4B···O3B      | 2.842(5)        | 2.059(4)        | 147.80(26)        | -x+2,+y-1/2,-z+1/2   |
| O4B–H4BE···O1B     | 2.748(11)       | 1.914(15)       | 171.90(55)        | -x+2,+y+1/2,-z+1/2   |
| C8B–H8BC···O3B     | 3.419(7)        | 2.677(4)        | 132.71(33)        | -x+2,+y-1/2,-z+1/2   |
| C11A–H11A···O4A    | 3.125(5)        | 2.496(3)        | 123.75(24)        | -x+1,+y+1/2,-z+1/2+1 |
| C4B–H4BD···S1A     | 3.856(21)       | 2.920(1)        | 140.28(50)        | x,-y+1/2+1,+z+1/2    |
| <b>AMT MAL-I</b>   |                 |                 |                   |                      |
| N3C–H3C···O2C      | 2.660(3)        | 1.810(2)        | 161.66(15)        | x,y,z                |
| N1B–H1B···O2B      | 2.687(3)        | 1.830(2)        | 163.94(15)        | x,y,z                |
| N4C–H1C···O1C      | 2.928(3)        | 2.053(2)        | 172.72(15)        | x,y,z                |
| N2B–H2B···O1B      | 2.841(3)        | 1.963(2)        | 174.92(16)        | x,y,z                |
| N4A–H4A···O1A      | 2.875(3)        | 1.999(2)        | 173.54(16)        | -x,-y+1/2,-z+1/2     |
| N3A–H3A···O2A      | 2.666(3)        | 1.797(2)        | 168.69(16)        | -x,-y+1/2,-z+1/2     |
| N2C–H2C···O4C      | 2.830(3)        | 1.952(2)        | 175.29(16)        | x-1,+y,+z            |
| N4B–H4B···O4B      | 2.921(3)        | 2.050(2)        | 170.08(16)        | x+1,+y,+z            |
| N2A–H2A···O4A      | 2.886(3)        | 2.015(2)        | 169.82(16)        | -x+1,+y+1/2,-z+1/2   |

|                                 |           |           |            |                    |
|---------------------------------|-----------|-----------|------------|--------------------|
| C7A–H7AB···O4B                  | 3.346(4)  | 2.546(2)  | 138.83(23) | x,y,z              |
| C5A–H5AE···O2B                  | 3.447(9)  | 2.629(2)  | 141.11(49) | x,y,z              |
| C9C–H9CB···O2B                  | 3.341(3)  | 2.516(2)  | 141.75(17) | -x+1,-y+1,-z+1     |
| C9C–H9CC···O2C                  | 3.441(3)  | 2.497(2)  | 161.73(16) | -x+1,-y+1,-z+1     |
| C9A–H9AA···O2B                  | 3.413(3)  | 2.441(2)  | 171.24(16) | -x+1,+y-1/2,-z+1/2 |
| C9A–H9AC···O2C                  | 3.346(3)  | 2.538(2)  | 139.70(17) | -x+1,+y-1/2,-z+1/2 |
| C9B–H9BA···O2A                  | 3.453(3)  | 2.525(2)  | 158.04(17) | x+1,+y+1,+z        |
| C7B–H7BB···O3A                  | 3.553(12) | 2.603(2)  | 161.42(50) | x+1,-y-1/2,+z+1/2  |
| C7B–H7BC···O3C                  | 3.312(9)  | 2.682(2)  | 122.42(50) | -x+2,-y+1,-z+1     |
| C9A–H9AC···S1C                  | 3.736(3)  | 2.941(1)  | 138.91(16) | -x+1,+y-1/2,-z+1/2 |
| <b>AMT MAL-II</b>               |           |           |            |                    |
| N1–H1···O2                      | 2.696(3)  | 1.842(2)  | 171.87(15) | x,y,z              |
| N2–H2···O1                      | 2.855(4)  | 1.999(3)  | 173.49(17) | x,y,z              |
| N4–H4···O3                      | 3.008(3)  | 2.196(3)  | 159.29(17) | x,-y+1/2+1,+z+1/2  |
| C9–H9A···O4                     | 3.424(4)  | 2.488(2)  | 164.90(20) | -x+2,-y+2-1,-z+1   |
| C9–H9B···O1                     | 3.381(4)  | 2.589(2)  | 139.99(21) | -x+2,-y+1,-z+1     |
| C11–H11···O3                    | 3.490(6)  | 2.759(4)  | 136.22(22) | -x+2,-y+1,-z+1     |
| <b>(AMTMAL)-2H<sub>2</sub>O</b> |           |           |            |                    |
| N3–H3···O2                      | 2.701(2)  | 1.846(2)  | 172.27(13) | x,y,z              |
| N4–H4···O1                      | 2.870(3)  | 2.011(2)  | 176.67(16) | x,y,z              |
| N2–H2···OW1                     | 3.011(4)  | 2.187(3)  | 160.47(18) | -x,-y+1,-z         |
| OW1–HW1B···OW2B                 | 2.687(19) | 1.965(19) | 142.20(57) | x,y,z              |
| OW2B–HW2A···O1                  | 2.756(26) | 2.003(2)  | 147.16(80) | -x+1,-y+1,-z+1     |
| C12–H12···O3                    | 3.417(4)  | 2.489(2)  | 175.39(20) | -x+2,-y+2,-z+2     |
| C8–H8B···O3                     | 3.594(3)  | 2.709(3)  | 153.42(13) | x-1,+y-1,+z        |
| C9–H9B···O4                     | 3.372(5)  | 2.552(3)  | 143.44(25) | -x+1,-y+2,-z+1     |

## COMPLEMENTARY FIGURES AND TABLES

**FIG. S1.** ASYMMETRIC UNIT OF (A) AMT ( $P2_1/c$ ,  $Z' = 2$ ), (B) AMT-FUM ( $P2_1/c$ ,  $Z' = 2$ ), (C) AMT-MAL-I ( $P2_1/c$ ,  $Z' = 3$ ), (D) AMT-MAL-II ( $P2_1/c$ ,  $Z' = 1$ ) AND (E) (AMT-MAL)·H<sub>2</sub>O ( $P\bar{1}$ ,  $Z' = 1$ ) WITH LABELLING THE SYMMETRY-INDEPENDENT MOLECULES. THE ELLIPSOID PLOT ARE DRAWN AT 50% PROBABILITY LEVEL. THE LOWEST OCCUPANCY PARTS OF DISORDERED FRAGMENTS ARE SHOWN WITH 50% TRANSPARENCY FOR CLARITY.

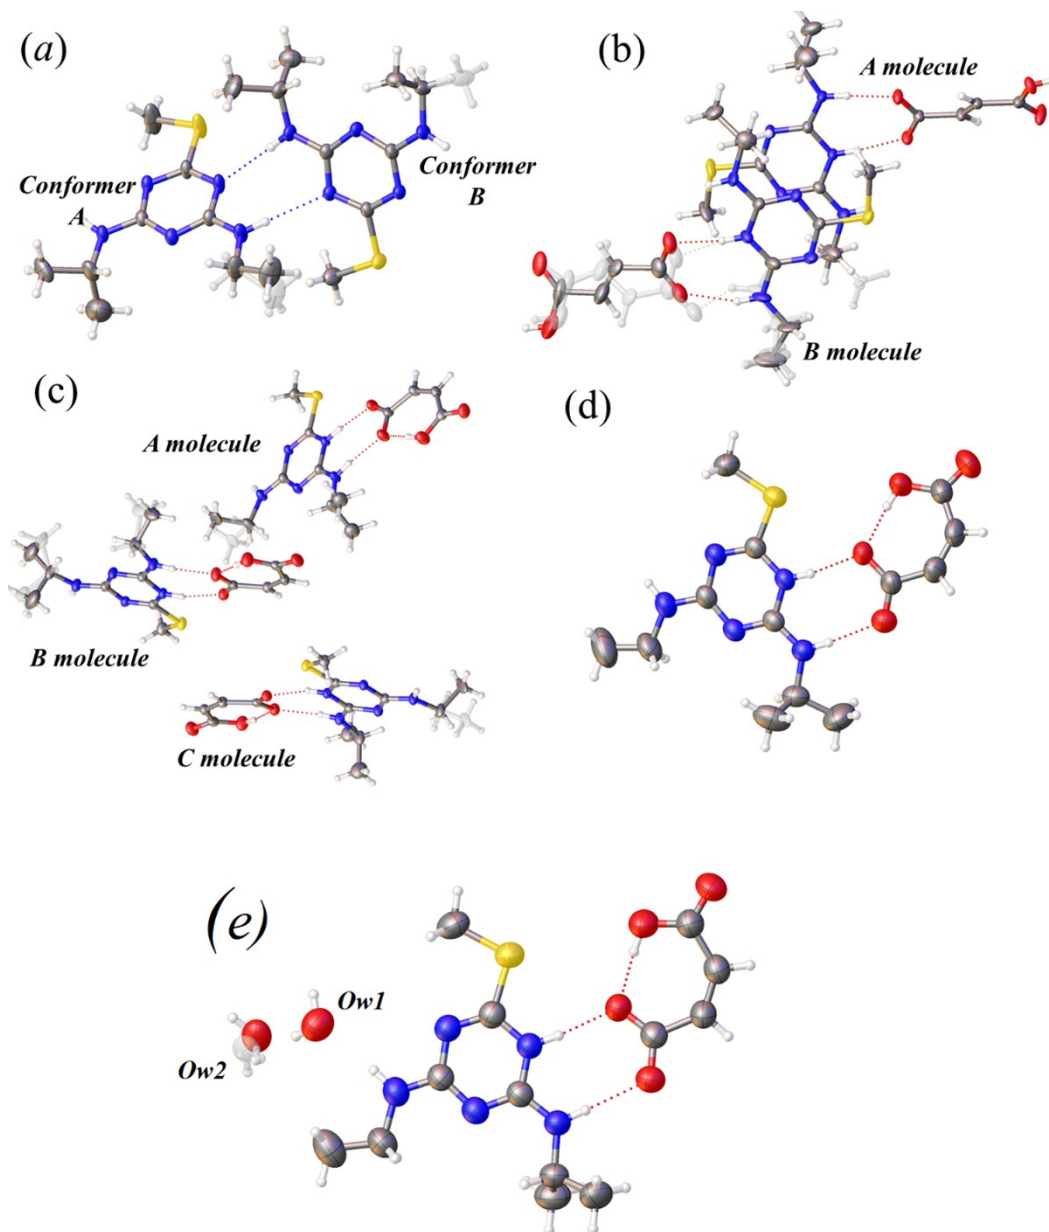

**FIG. S2:** ALONG THE [100] DIRECTION, ADJACENT AMT CHAINS STACKS PARALLEL TO EACH OTHER VIA  $\text{CH}\cdots\pi$  (LIGHT GREEN DASH LINE ) AND  $\text{S}\cdots\pi$  (ORANGE DASH LINE) INTERACTIONS RESULTING IN DOMAINS OF LAYERED STRUCTURE.

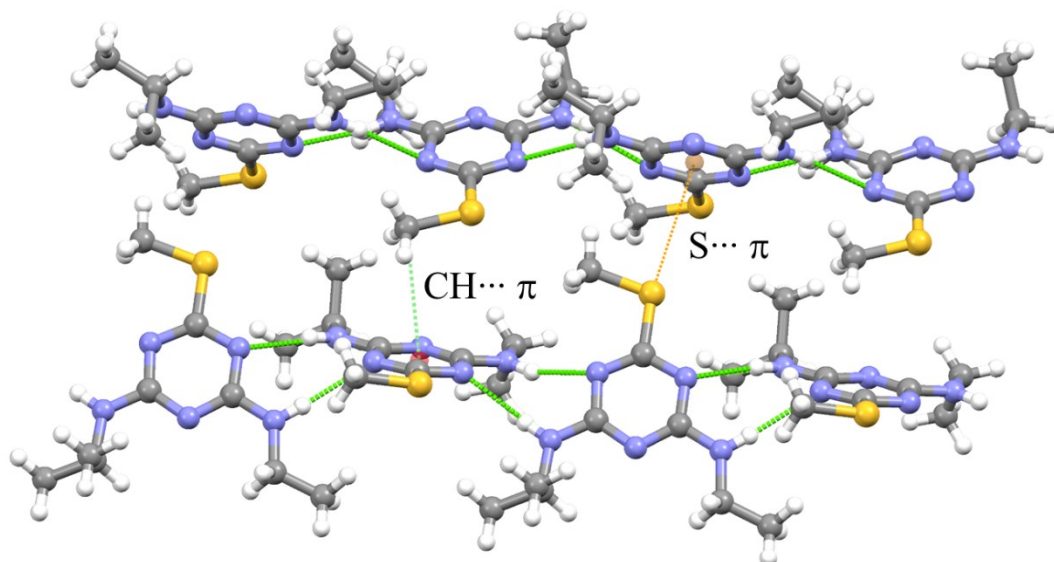

**Fig. S3.** In the unit cell of AMT ( $Z' = 2$ ), the A and B conformers are alternately arranged along the [100] direction, such that, the independent molecules are offset each other by  $55.34^\circ$ . In this figure, the red plane defines to that formed by the main plane of conformer A while the blue one is define by conformer B. The molecular overlay of highest occupancy parts of A and B conformers from AMT superimposed through s-triazine groups.

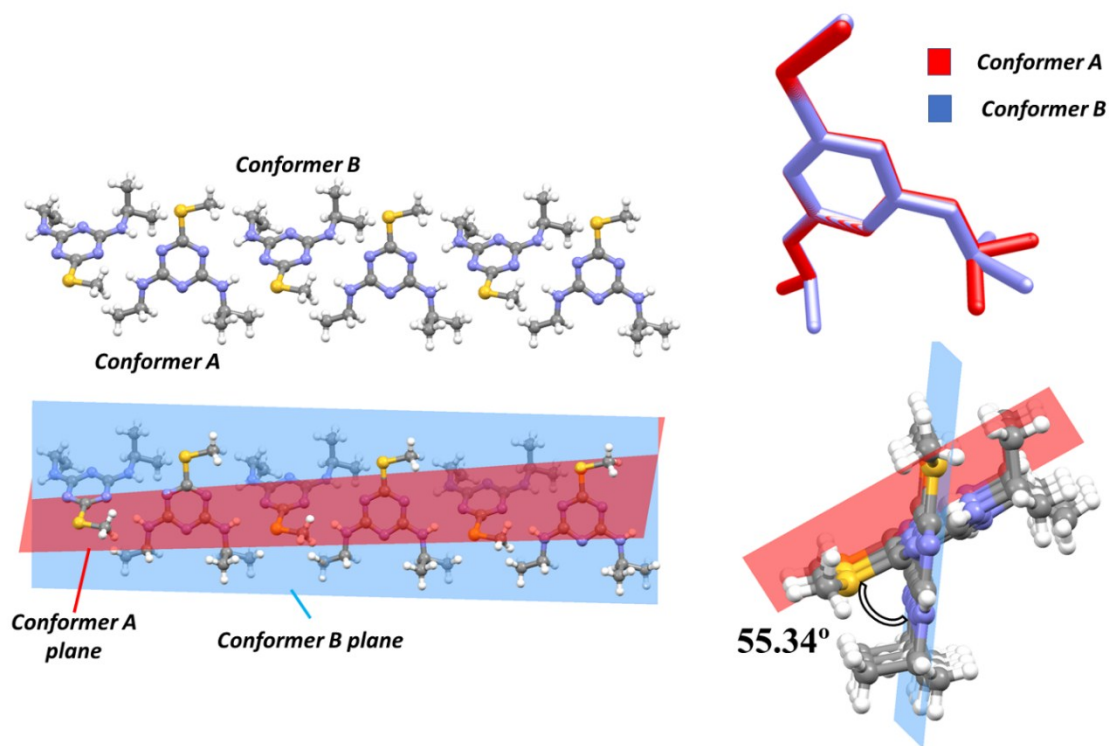



**FIG. S4:** FOURIER DIFFERENCE MAP FOR THE (A) MOLECULE A AND B FROM AMT-FUM SALT. IT SEEN THE PROTONATION OF AMT MOLECULE ON THE N5-ATOM FOR BOTH CASES. (B) MOLECULAR CONFORMATIONS OF AMT CATIONS (A AND B MOLECULES) IN AMT-FUM SALT. HIGHEST OCCUPANCY PARTS CONSIDERED IN THE PRESENTATION.

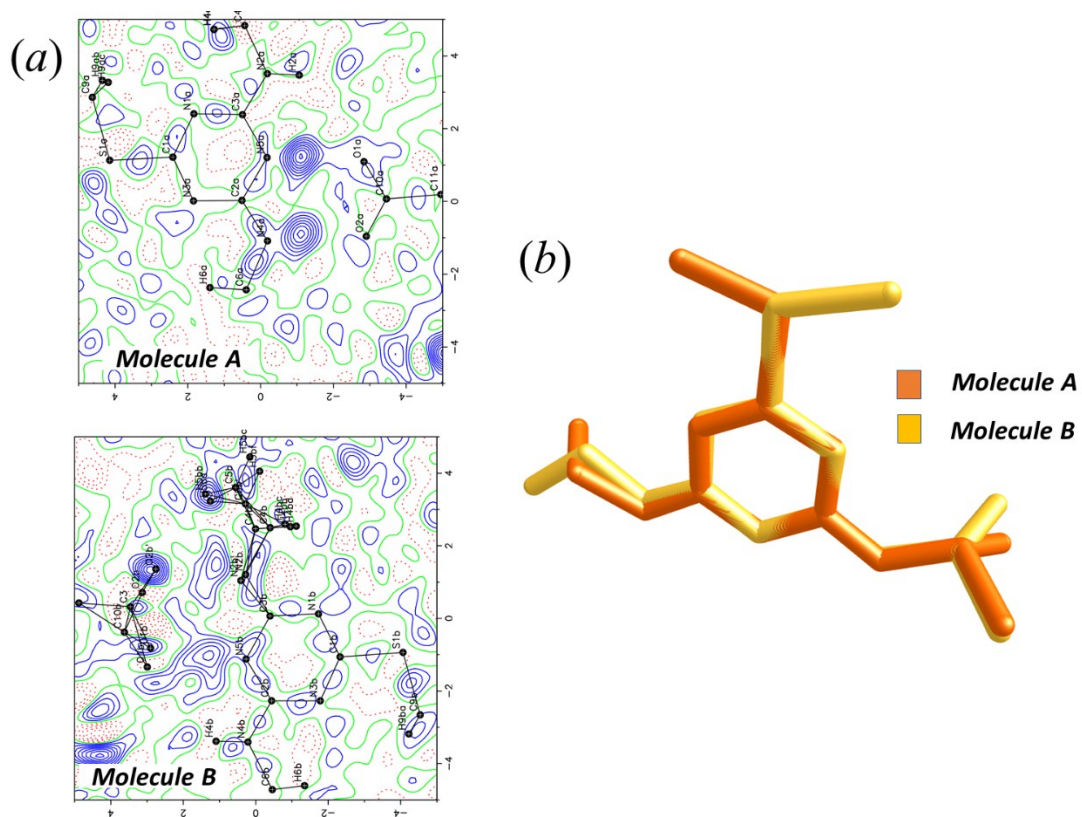

**Fig. S5** - (a) Fourier difference maps of both A and B molecules of AMT-MAL-I showing the presence of an H-atom attached to N5 atom ones for both cases. (b) Overlay of the AMT<sup>+</sup> conformers of AMT-MAL-I using the s-triazine groups as the common reference.

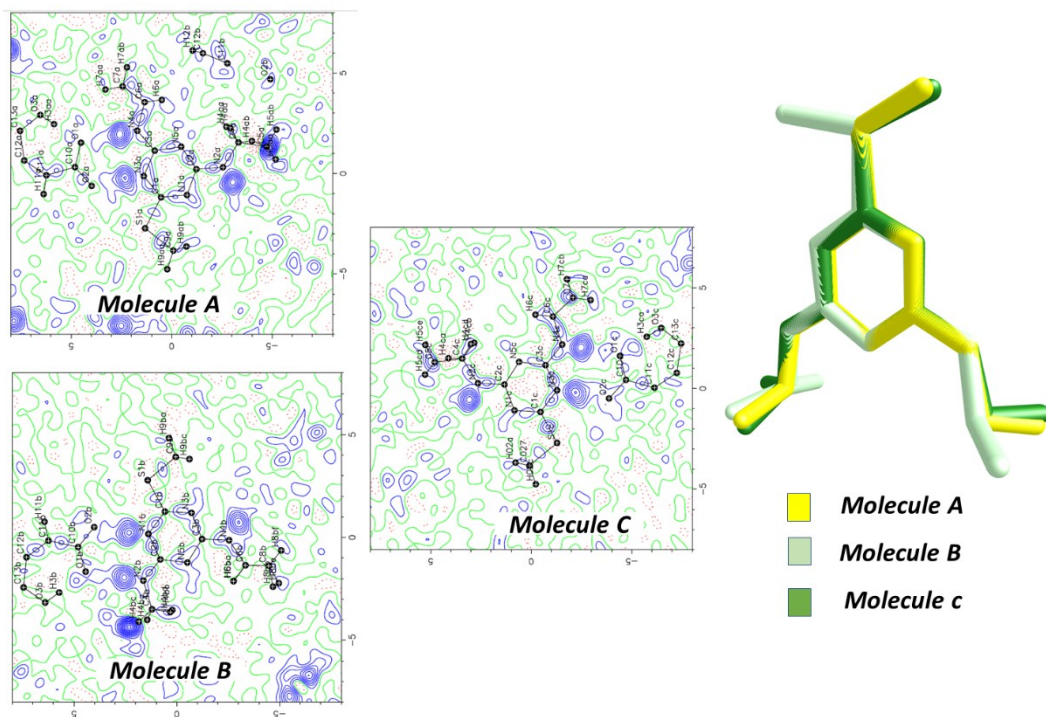

**Fig. S6** - Beside the conformational and ionization multiplicity of  $\text{AMT}^+$ , the polymorphism of ametryn maleate is also associated to diversity of cation-anion assemblies. (a) The ionic pair in AMT-MAL-I interact that way carboxylic of acid and the sulfur-methyl groups of AMT are cis-oriented. Opposite situation are found in AMT-MAL-II. (c)  $\pi \cdots \pi$  interaction between  $\text{AMT}^+$  molecules in AMT-MAL-I.

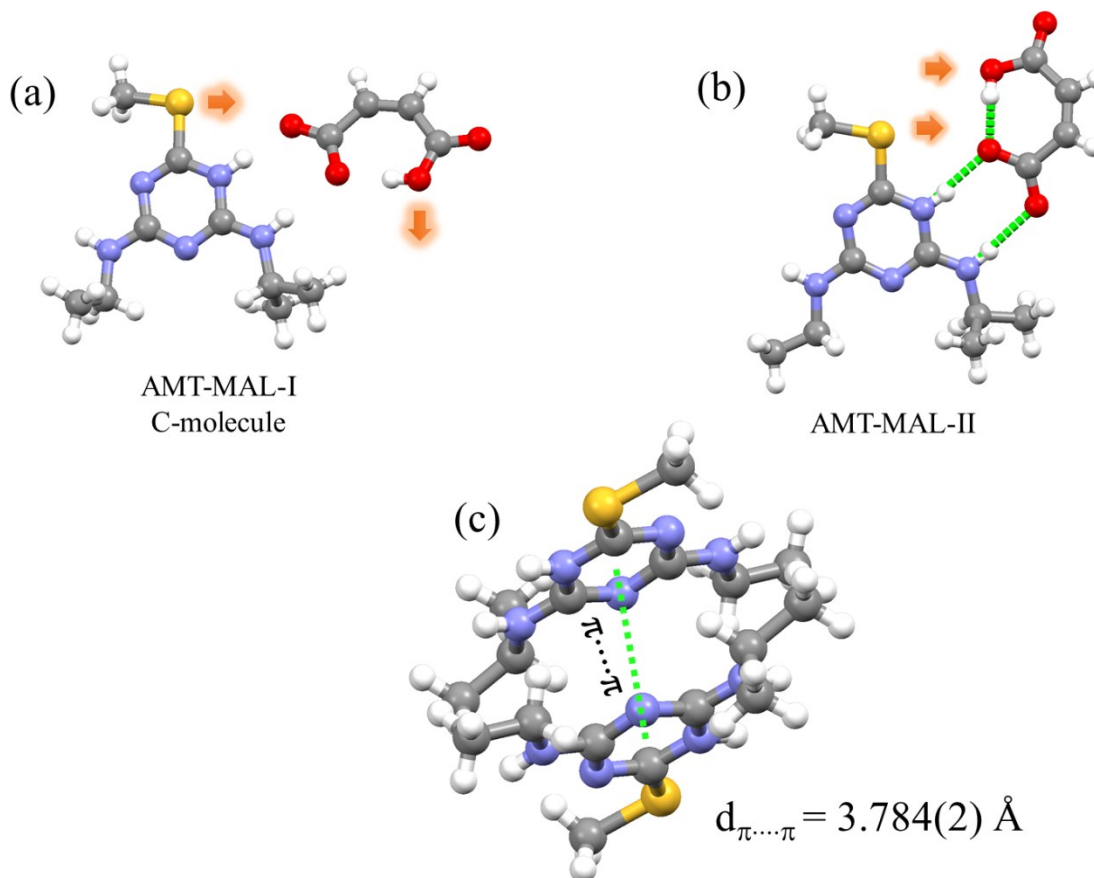

**Fig. S7** - (a) The packing of (AMT-MAL) $\cdot$ 2H $_2$ O illustrating the water channels (blue circles - viewed along [100] direction). (b) The (H $_2$ O) $_2$  clusters featuring in the crystal structure (water channel core). (c)  $\pi$  $\cdots$  $\pi$  Interactions between AMT $^+$  $\cdots$ H $_2$ O assemblies.

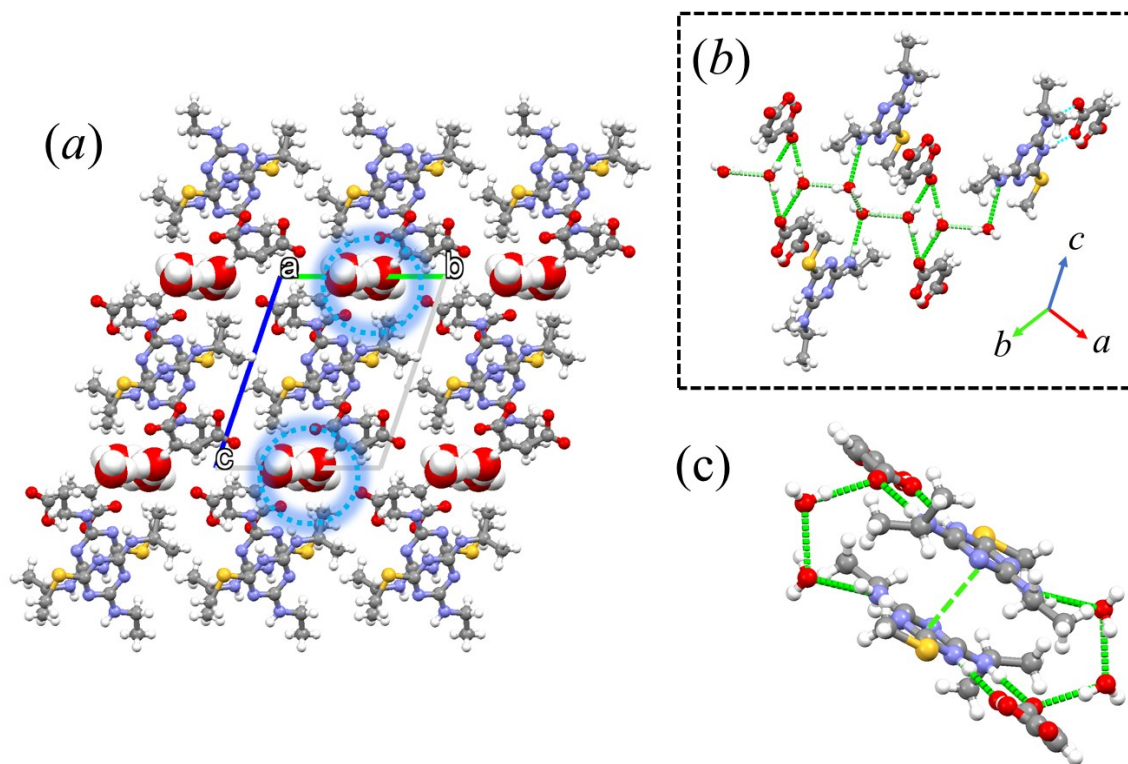

**Figure S8** - Diffractograms of AMT and its salts. For all compounds, the experimental and calculated PXRD patterns show an excellent agreement which indicates the purity (unique phase) of the samples.

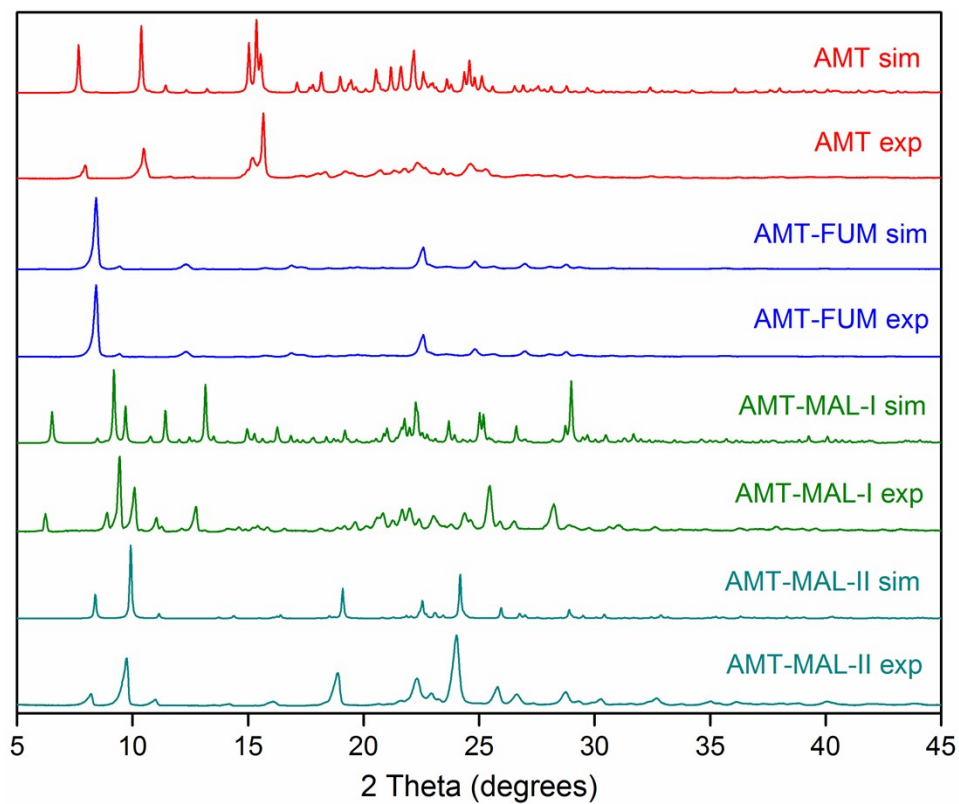

**Figure S10** - Aqueous solubility (blue bars) and melting point (line) of AMT and its salts.

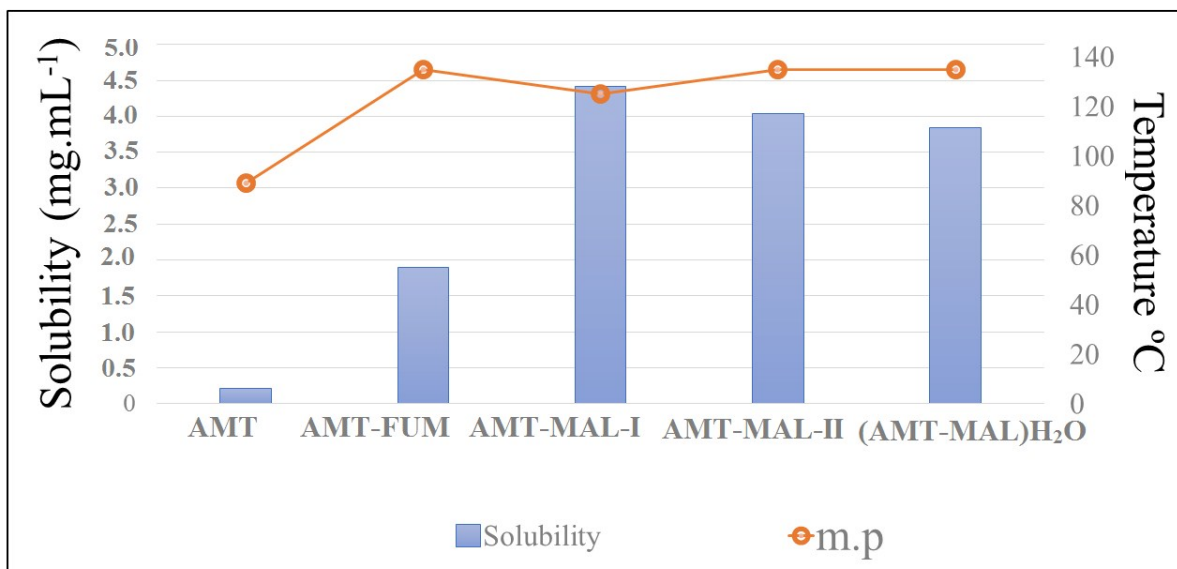

**Table S3** - Energy differences between the AMT conformer from AMT and AMT-FUM

| Ametryn                                                       |                                          |
|---------------------------------------------------------------|------------------------------------------|
|                                                               | $E + E_{ZPVE}$ , kcal. mol <sup>-1</sup> |
| A                                                             | -643115,0062                             |
| B                                                             | -643118,0213                             |
| Ametryn fumarate                                              |                                          |
| A*                                                            | -643424,1252                             |
| B*                                                            | -643426,9791                             |
| Ametryn Fumarate Deprotonated                                 |                                          |
| A†                                                            | -643108,0278                             |
| B†                                                            | -643108,8987                             |
| $[E(A^\dagger) + E(A^\dagger)_{ZPVE}] - [E(A) + E(A)_{ZPVE}]$ | -6,9784275                               |
| $[E(B^\dagger) + E(B^\dagger)_{ZPVE}] - [E(B) + E(B)_{ZPVE}]$ | -9,122595                                |



**Figure S11.** Herbicide 4.98 to 51.358 application system

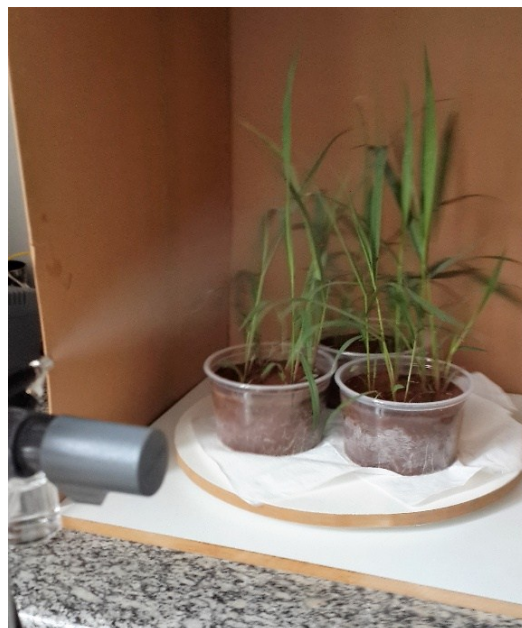

Similarly, applications of AMT salts were tested. These application solutions prepared dissolving an amounts of AMT-FUM and AMT-MAL-I salts equivalent to the to 1.0 kg ha<sup>-1</sup> dose in water in order to simulate the field application of 400 L ha<sup>-1</sup>. After stirring, 150 rpm during 5 min, an aliquot of the solution was collected to determine the soluble concentration of AMT in solution before spraying. The GIW of these systems were compared with the control treatment, the 0 dose of AMT. All experiments were carried out in triplicate.

After 14 days of herbicide application, the plants were cut and dried in a forced-air oven at 70 °C for 72h to determine the dry matter content (DM). The herbicidal efficacy of AMT (at different doses), AMT-FUM and AMT-MAL-I were estimated through of the growth inhibition of *Brachiaria decumbens* after herbicide application. The Growth Inhibition index ( $\nu$ ) was calculated using the equation:

$$\nu = 100 - [(DM_x - DM_i)/(DM_{control} - DM_i)] \times 100 \quad \text{Equation 1}$$



where  $DM_x$  is the dry matter content of each sample,  $DM_i$  is the dry matter average content before AMT application, and  $DM_{control}$  is the dry matter content of control treatment (0 dose of AMT).

## REFERENCES

- [1] S. L. Childs, G. P. Stahly, A. Park, *Mol. Pharm.* **2007**, *4*.
- [2] a) A. D. Burrows, in *Supramolecular Assembly via Hydrogen Bonds I* (Ed.: D. M. P. Mingos), Springer Berlin Heidelberg, Berlin, Heidelberg, **2004**; b) V. R. Aldilla, M. Bhadbhade, S. Bhattacharyya, N. Kumar, A. M. Rich, C. E. Marjo, *CrystEngComm* **2017**, *19*; c) T. Le, M. Bhadbhade, J. Gao, J. M. Hook, C. E. Marjo, *CrystEngComm* **2016**, *18*; d) G. J. Perpétuo, J. Janczak, *J Mol Struct* **2018**, *1152*.
- [3] C. R. Groom, I. J. Bruno, M. P. Lightfoot, S. C. Ward, *Acta Crystallogr B* **2016**, *72*.
- [4] J. Bernstein, R. J. Davey, J.-O. Henck, *Angew Chem Int Ed Engl* **1999**, *38*.
- [5] Bruker, in *Bruker AXS Inc*, Madison, Wisconsin, USA., **2001**.
- [6] R. W. W. Hoof, (Ed.: N. BV), Delft, The Netherlands, **1998**.
- [7] Z. Otwinowski, W. Minor, in *Methods in Enzymology*, 276 (Ed.: Charles W. Carter, Jr.), Academic Press, **1997**.
- [8] O. V. Dolomanov, L. J. Bourhis, R. J. Gildea, J. A. K. Howard, H. Puschmann, *J Appl Crystallogr* **2009**, *42*.
- [9] G. Sheldrick, *Acta Crystallogr C* **2015**, *71*.
- [10] C. F. Macrae, I. J. Bruno, J. A. Chisholm, P. R. Edgington, P. McCabe, E. Pidcock, L. Rodriguez-Monge, R. Taylor, J. van de Streek, P. A. Wood, *J Appl Crystallogr* **2008**, *41*.
- [11] W. I. F. David, *Structure Determination from Powder Diffraction Data*, Oxford University Press, **2002**.
- [12] P. Hohenberg, W. Kohn, *Physical Review* **1964**, *136*, B864-B871; b) W. Kohn, L. J. Sham, *Physical Review* **1965**, *140*, A1133-A1138.
- [13] M. J. Frisch, G. W. Trucks, H. B. Schlegel, G. E. Scuseria, M. A. Robb, J. R. Cheeseman, G. Scalmani, V. Barone, B. Mennucci, G. A. Petersson, H. Nakatsuji, M. Caricato, X. Li, H. P. Hratchian, A. F. Izmaylov, J. Bloino, G. Zheng, J. L. Sonnenberg, M. Hada, M. Ehara, K. Toyota, R. Fukuda, J. Hasegawa, M. Ishida, T. Nakajima, Y. Honda, O. Kitao, H. Nakai, T. Vreven, J. A. Montgomery, J. E. Peralta, F. Ogliaro, M. Bearpark, J. J. Heyd, E. Brothers, K. N. Kudin, V. N. Staroverov, R. Kobayashi, J. Normand, K. Raghavachari, A. Rendell, J. C. Burant, S. S. Iyengar, J. Tomasi, M. Cossi, N. Rega, J. M. Millam, M. Klene, J. E. Knox, J. B. Cross, V. Bakken, C. Adamo, J. Jaramillo, R. Gomperts, R. E. Stratmann, O. Yazyev, A. J. Austin, R. Cammi, C. Pomelli, J. W. Ochterski, R. L. Martin, K. Morokuma, V. G. Zakrzewski, G. A. Voth, P. Salvador, J. J. Dannenberg, S. Dapprich, A. D. Daniels, Farkas, J. B. Foresman, J. V. Ortiz, J. Cioslowski, D. J. Fox, Wallingford CT, **2009**.

- [14] Y. Zhao, D. Truhlar, *Theor Chem Account* **2008**, 120.
- [15] C. o. Europe, *European Pharmacopoeia 5th Ed. Main Volume 5.0, 2005 with Supplements 5.1 and 5.2*, Renouf Publishing Company Limited, **2004**; bH. M. Eirkson C, Osbourne CM, Sayre PG, Zeeman M in *Environmental assessment technical assistance handbook, Vol. 31* (Ed.: U. S. F. a. D. Administration), Washington DC, **1987**.
- [16] a) V. J. Kilmer, I. T. Alexander, *Soil Science* **1949**, 68; b) V. V. H. Alvarez, R. Novais, L. Dias, J. A. Oliveira, *Pesq. agropec. bras.* **2000**, **52**; c) EMBRAPA, 3th ed. (Ed.: E. B. d. P. Agropecuária), Embrapa-SEA, Brasília, **2017**; d) D. W. Nelson, L. E. Sommers, in *Methods of Soil Analysis. Part 3 Chemical Methods*, 5 (Ed.: D. L. Sparks, et. al.), SSSA and ASA, Madison, WI, **1996**.
- [17] R. F. Novais, J. C. L. Neves, N. F. Barros, in *Métodos de pesquisa em fertilidade do solo* (Eds.: W. E. Garrido, J. D. Araújo, S. Lourenço), Embrapa-SEA, Brasília, **1991**.
